# Supplementary figures and images for: Meta-analysis Comparing Outcomes of Two Different Negative Pressure Therapy Systems in Closed Incision Management
Source: PubMed Central journal article supplement — Plast Reconstr Surg Glob Open. 2019 Jun 21;7(6):e2259. doi: 10.1097/GOX.0000000000002259 (PMC6635196; doi:10.1097/gox.0000000000002259), 2019-06-21

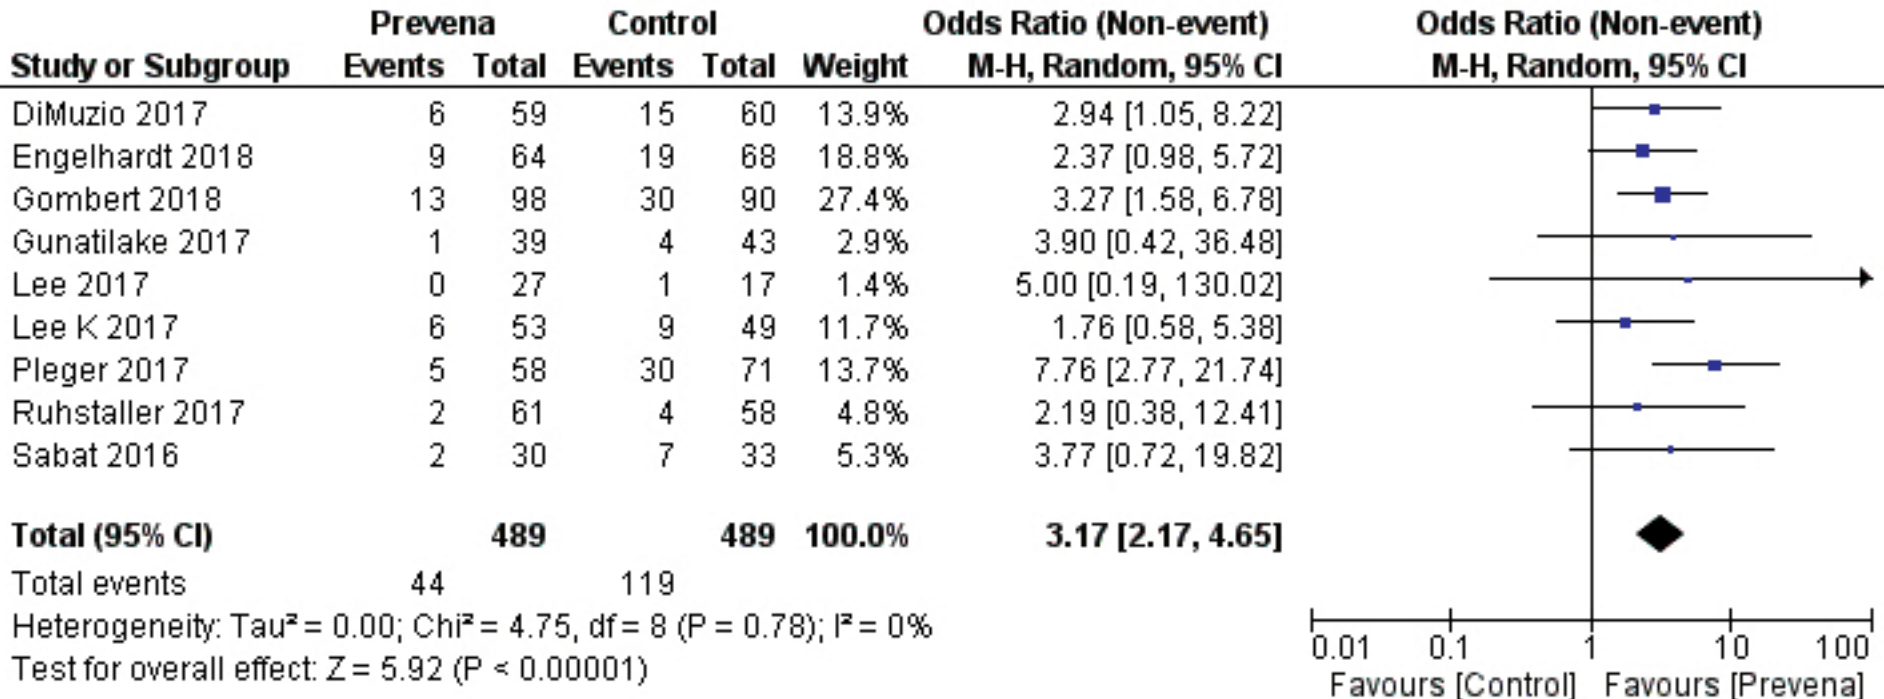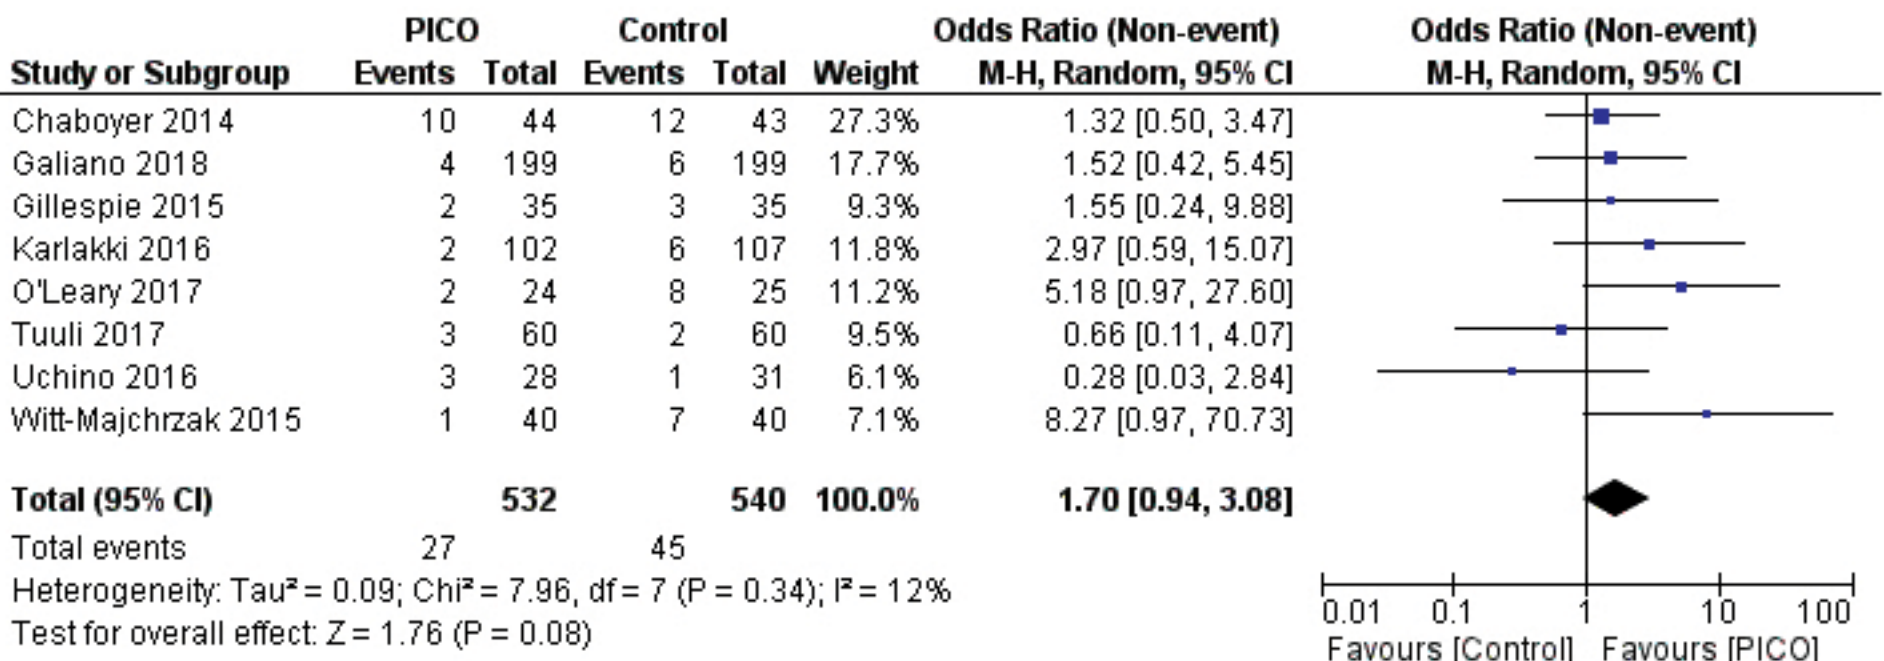

Supplement: gox-7-e2259-s001.pdf [file gox-7-e2259-s001.pdf]
